# Supplementary material
Source: PubMed Central journal article supplement (PMC10700664)
Supplement: NIHMS1905409-supplement-1.pdf [file NIHMS1905409-supplement-1.pdf]

## Supplementary Materials for

### Template-guided method for protein-ligand complex structure prediction: Application to CASP15 protein-ligand studies

Xianjin Xu<sup>†</sup>, Rui Duan<sup>†</sup>, Xiaoqin Zou<sup>\*</sup>

*Dalton Cardiovascular Research Center, Department of Physics, Department of Biochemistry, Institute for Data Science and Informatics, University of Missouri, Columbia, Missouri 65211, United States*

<sup>†</sup>equal contribution

<sup>\*</sup>corresponding author ([zoux@missouri.edu](mailto:zoux@missouri.edu))

**Table S1** Performance of our modeling methods in CASP15 ligand predictions. The results were based on the top 5 submitted models for each target.

| Target  | Ligands            | IDDT_pli                 | RMSD (Å)                  | Template |
|---------|--------------------|--------------------------|---------------------------|----------|
| H1114   | 3NI/F3S/FCO/MG/MQ7 | 0.86/0.82/0.95/0.93/0.05 | 0.70/1.06/0.43/0.50/20.15 | 1e3d     |
| H1135   | K                  | 0.99                     | 0.06                      | 6r15     |
| T1124   | SAH/TYR            | 0.62/0.39                | 3.07/5.23                 | 4a6e     |
| T1127v2 | COA                | 0.66                     | 4.19                      | 3bj7     |
| T1146   | NAG                | 0.97                     | 0.46                      | 4q68     |
| T1152   | NAG                | 0.79                     | 1.48                      | 4b8v     |
| T1158v1 | XPG                | 0.73                     | 3.06                      | -        |
| T1158v2 | P2E                | 0.63                     | 3.1                       | -        |
| T1158v3 | XH0                | 0.00                     | 20.61                     | 6uy0     |
| T1158v4 | ATP/MG             | 0.80/0.95                | 1.26/2.31                 | 6uy0     |
| T1170   | ADP/AGS/MG         | 0.90/0.86/0.92           | 0.88/1.12/1.27            | 6oax     |
| H1171   | ADP/AGS/MG         | 0.91/0.86/0.97           | 0.72/1.35/0.54            | 6oax     |
| H1172   | ADP/AGS/MG         | 0.88/0.82/1.00           | 0.83/1.13/0.39            | 6oax     |
| T1181   | CA/OAA/ZN          | 0.00/0.31/0.45           | 138.32/9.47/3.80          | -        |
| T1186   | LIG                | 0.65                     | 3.76                      | 6cyq     |
| T1187   | NAG                | 0.05                     | 16.02                     | -        |
| T1188   | CD/CO/DW0          | 0.75/0.18/0.66           | 1.55/9.76/4.16            | 2ybt     |
